# Supplementary material for: Novel small molecule inhibiting CDCP1‐PKCδ pathway reduces tumor metastasis and proliferation
Source: PubMed Central journal article supplement — Cancer Sci. 2017 May 11;108(5):1049–57. doi: 10.1111/cas.13218 (PMC5448658; doi:10.1111/cas.13218), 2017-05-11
Supplement: CAS-108-1049-s002.pdf [file CAS-108-1049-s002.pdf]

Fig. S1

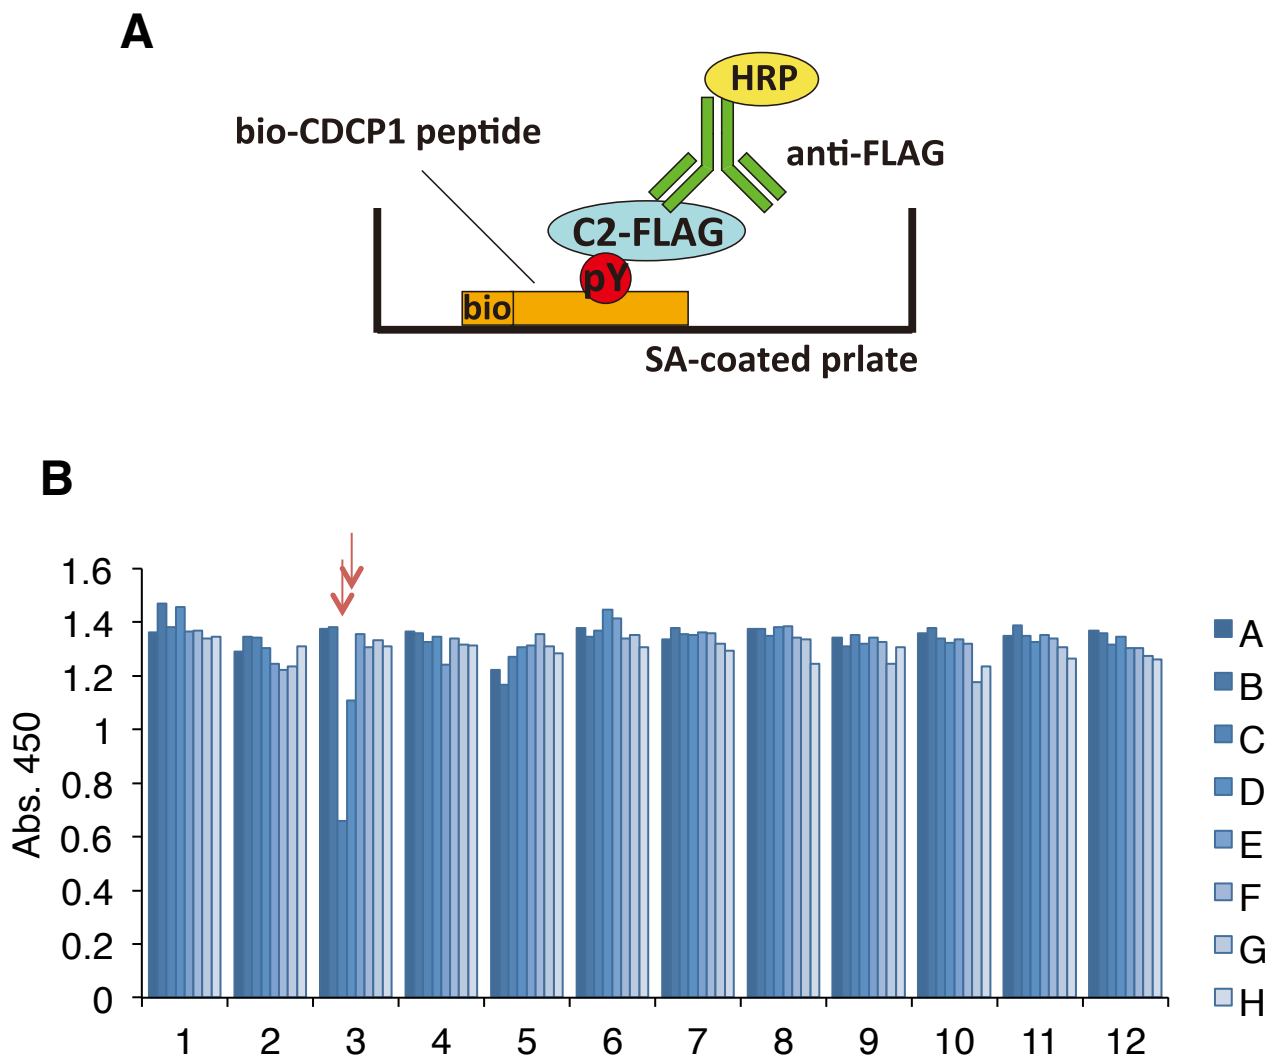

**Fig. S1, Chemical Screening**

A, Scheme of CDCP1-C2 binding assay. Biotinylated peptide (bio-CDCP1) was immobilized on streptavidin (SA)-coated plate. C2-FLAG recombinant protein was bound to the peptide and then the bound protein was detected by colorimetric reaction of TMB following binding of anti-FLAG antibody conjugated with peroxidase. B, Chemical screening. Chemical screening was performed as described in MATERIALS AND METHODS. The graph shows that the results of a plate that containing positive well, 5-3C and 5-3D (arrows).

## Fig. S2

(1) Pd-Oqn = Chloror{N-(hydroxo-quinoline-2-ylmethylidene)- $\beta$ -D-glucosamine}palladium(II)

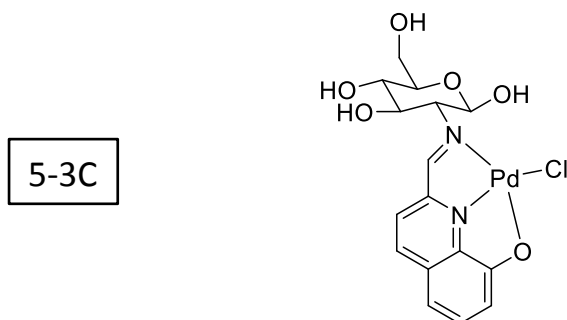

Chemical Formula: C<sub>16</sub>H<sub>17</sub>ClN<sub>2</sub>O<sub>6</sub>Pd  
Molecular Weight: 475.19

Pd-Oqn: <sup>1</sup>H NMR (400 MHz, DMSO-*d*<sub>6</sub>)  $\delta$  8.54 (d, *J* = 8.8 Hz, 1H), 8.20 (s, 1H), 7.84 (d, *J* = 8.8 Hz, 1H), 7.45 (t, *J* = 8.4 Hz, 1H), 7.11 (d, *J* = 6.4 Hz, 1H), 7.00 (d, *J* = 8.4 Hz, 1H), 6.58 (d, *J* = 8.4 Hz, 1H), 5.53-5.44 (m, 2H), 5.18 (d, *J* = 4.4 Hz, 1H), 4.58 (t, *J* = 6.0 Hz, 1H), 4.19 (td, *J* = 8.8 Hz, 5.6 Hz, 1H), 3.75-3.66 (m, 1H), 3.47-3.37 (m, 1H), 3.31-3.24 (m, 1H), 3.13 (td, *J* = 8.8 Hz, *J* = 4.4 Hz, 1H), 2.87 (t, *J* = 8.8 Hz, 1H).

(2) Pt-Oqn = Chloror{N-(hydroxo-quinoline-2-ylmethylidene)- $\beta$ -D-glucosamine}platinum(II)

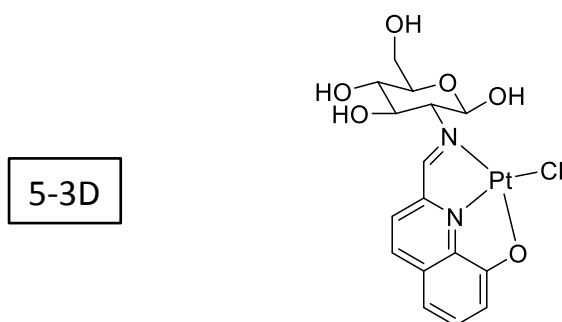

Chemical Formula: C<sub>16</sub>H<sub>17</sub>ClN<sub>2</sub>O<sub>6</sub>Pt  
Molecular Weight: 563.854

Pt-Oqn: <sup>1</sup>H NMR (400 MHz, DMF-*d*<sub>7</sub>)  $\delta$  8.57 (s, 1H), 8.53 (d, *J* = 8.8 Hz, 1H), 7.87 (d, *J* = 8.8 Hz, 1H), 7.42 (t, *J* = 7.6 Hz, 1H), 7.30 (d, *J* = 6.4 Hz), 6.99 (d, *J* = 7.6 Hz, 1H), 6.61 (d, *J* = 7.6 Hz, 1H), 5.82 (t, *J* = 7.2 Hz, 1H), 5.71 (d, *J* = 5.2 Hz, 1H), 5.31 (d, *J* = 5.2 Hz, 1H), 4.75 (t, *J* = 6.0 Hz, 1H), 4.58 (td, *J* = 5.2 Hz, *J* = 9.2 Hz), 3.93-3.85 (m, 1H), 3.68-3.60 (m, 1H), 3.57-3.49 (m, 2H), 3.39-3.26 (m, 2H).

**Fig. S2, Structures of the inhibitory compounds for the C2-CDCP1 interaction**

Fig. S3

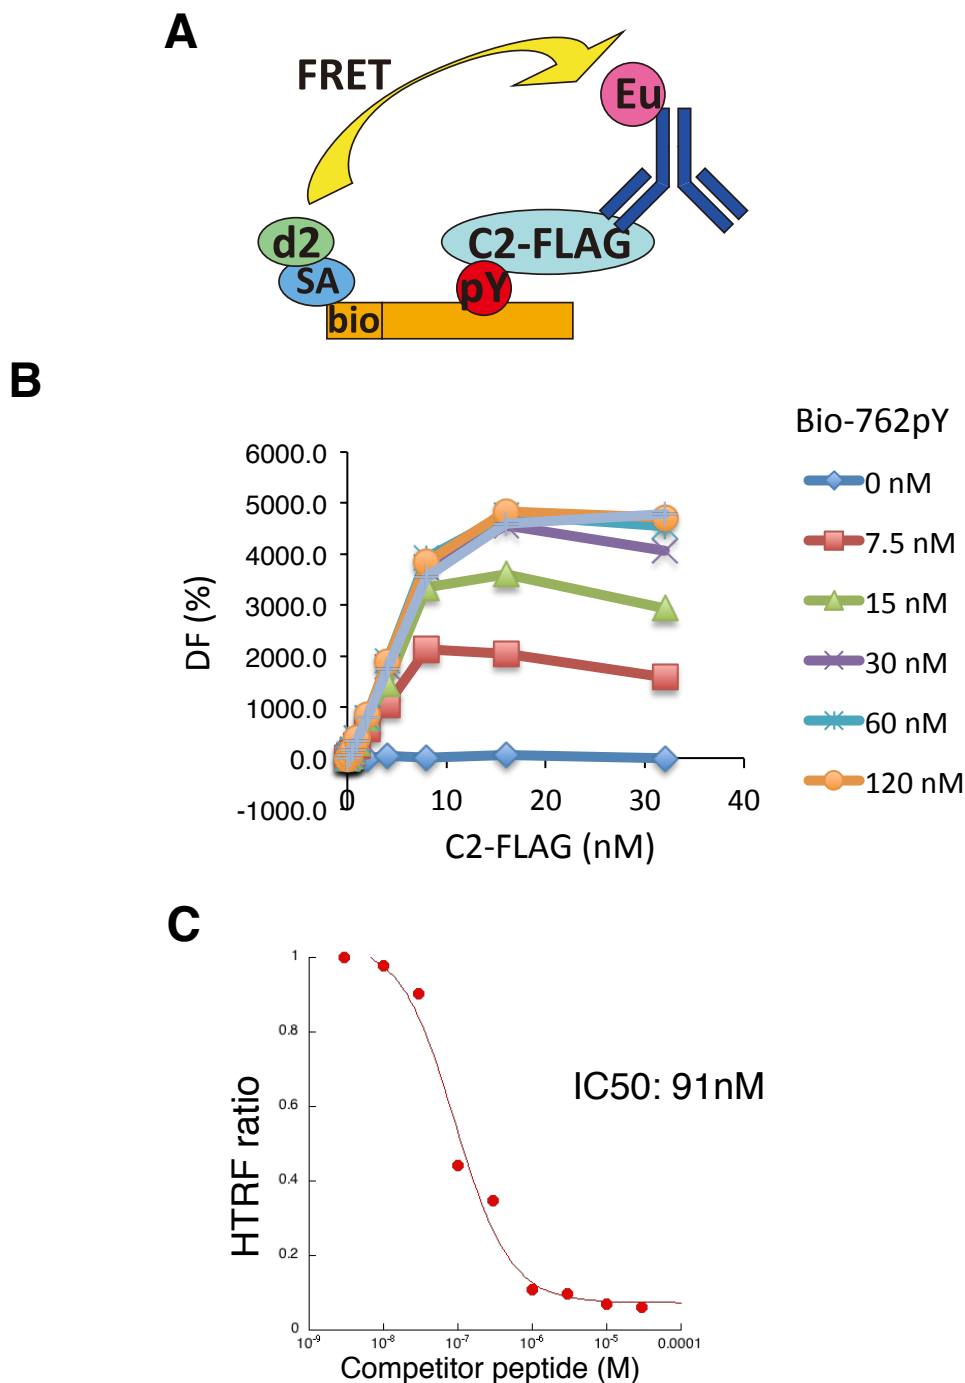

**Fig. S3. HTRF assay**

A, Scheme of HTRF assay for CDCP1-PKCdelta binding. Homogeneous time-resolved fluorescence (HTRF) assay measures the signal generated by two components when they are in close proximity. The C2-CDCP1 binding assay uses a biotinylated peptide (bio-762-pY) derived from the PKCdelta-binding domain of CDCP1 and recombinant C2-FLAG protein. Binding is detected by anti-FLAG-Eu and streptavidin (SA)-d2. Upon binding of bio-762pY and C2-FLAG, Eu and d2 are brought in close proximity resulting in energy transfer between the two fluorophores and a long-lived signal at 665 nm, which represents the bound fraction. B, Dose-dependent signal of HTRF on C2-CDCP1 binding assay. C, Inhibition of C2-CDCP1 binding by free peptide CP762pY.

**Fig. S4**

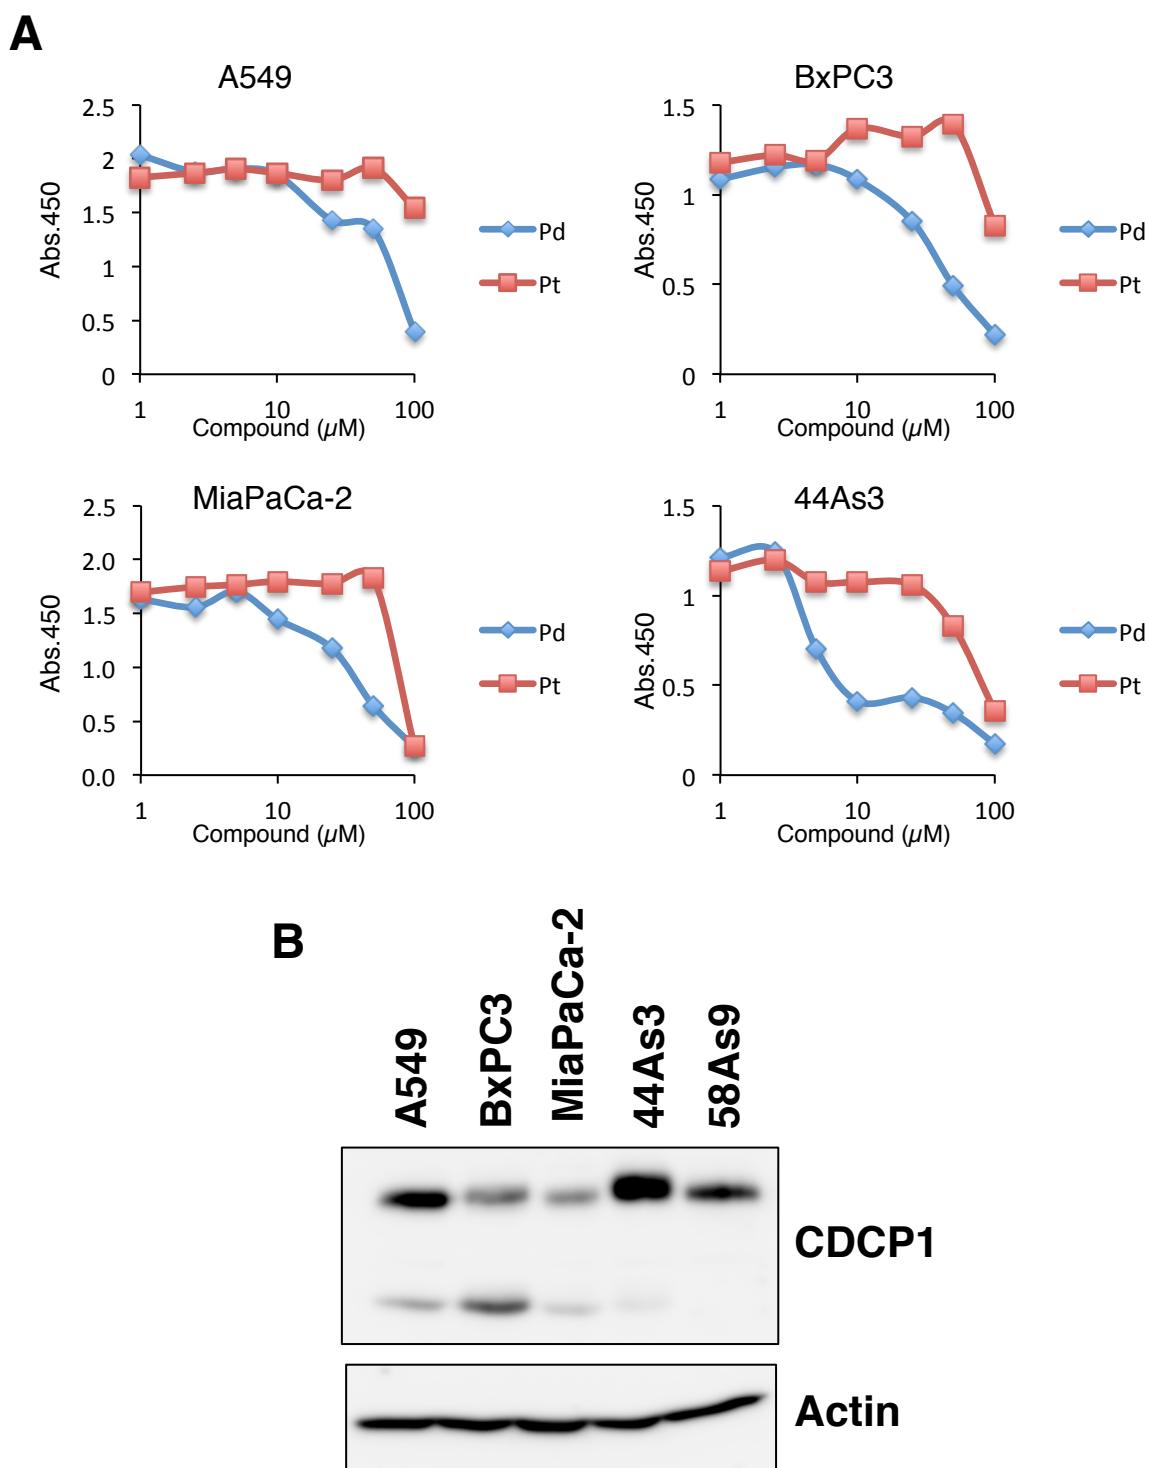

**Fig. S4. Effect of the compounds on proliferation of cancer cells**

A, Inhibition of the cell proliferation by Pd-Oqn and Pt-Oqn. The cells were seeded on 96-well plate at  $3 \times 10^3$  cells/well with or without these compounds. The cell viability after 48 hrs was measured by CCK assay.

**Fig. S5**

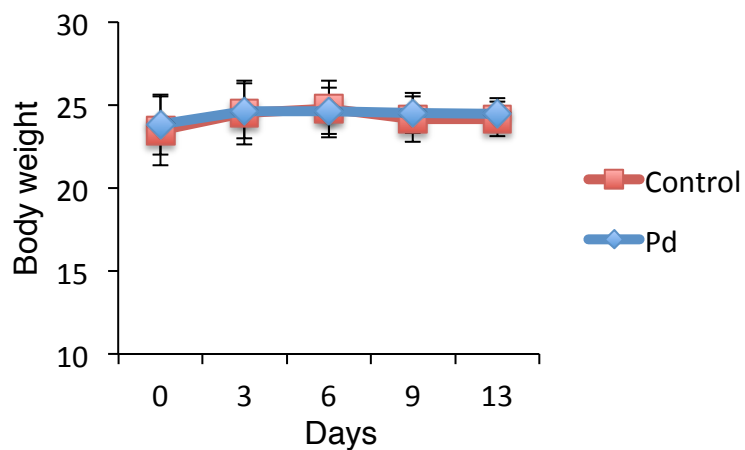

**Fig. S5. Body weight of the mice treated with Pd-Oqn**

Injection of Pd-Oqn (blue) or DMSO (red) on mouse peritoneal dissemination model was performed as described in Fig. 6A. The graph indicated the body weight as the mean  $\pm$  standard error (DMSO; n=11, Pd-Oqn; n=13).

Fig. S6

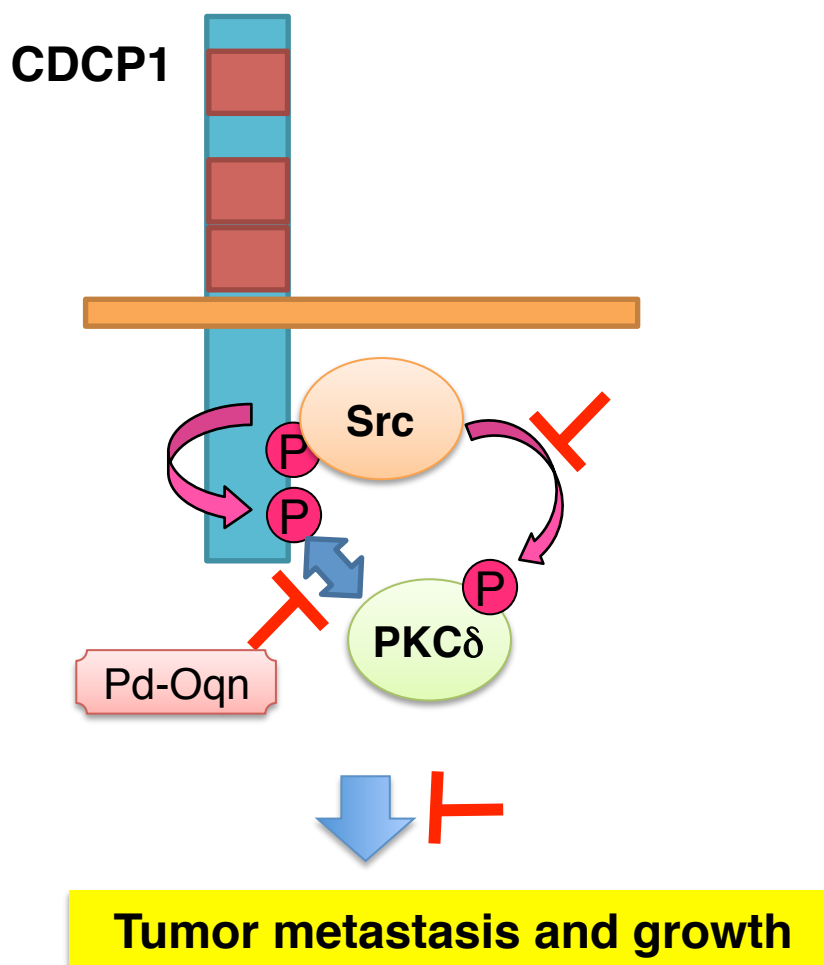

**Fig. S6. Model for molecular action of Pd-Oqn**

CDCP1 that is a transmembrane protein is predominantly expressed in various cancer cells. Intracellular region of CDCP1 is tyrosine-phosphorylated by Src family kinases. PKC $\delta$  is recruited to the phosphorylated site and also phosphorylated by SFK, which play important role for anchorage-independent cell growth and cancer metastasis. The small molecule Pd-Oqn identified here inhibits the interaction of PKC $\delta$  with phosphorylated CDCP1 and PKC $\delta$  is eventually inhibited its phosphorylation. The blocking CDCP1-PKC $\delta$  pathway results in the suppression of tumor metastasis and growth.

**Fig. S7**

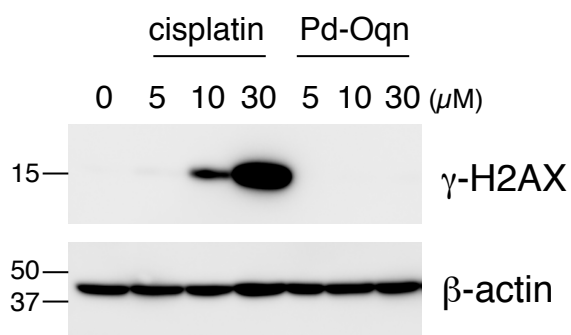

**Fig. S7. No DNA damage response by Pd-Oqn**

44As3 cells were treated with the indicated concentration of cisplatin or Pd-Oqn for 4hrs and then lysed in RIPA buffer (25mM Tris-HCl (pH 7.4), 150mM NaCl, 1% NP-40, 1% sodium deoxycholate, and 0.1% SDS) containing phosphatase inhibitor and protease inhibitor. The cell lysate was subjected to western blotting with anti- $\gamma$ H2AX or anti- $\beta$ -actin.
